# Supplementary material for: Transmission of a heterologous clade C Symbiodinium in a model anemone infection system via asexual reproduction
Source: PubMed Central journal article supplement (PMC5012276; doi:10.7717/peerj.2358), 2016-08-24
Supplement: peerj-04-2358-s001.pdf [file peerj-04-2358-s001.pdf]

## Supplementary Data

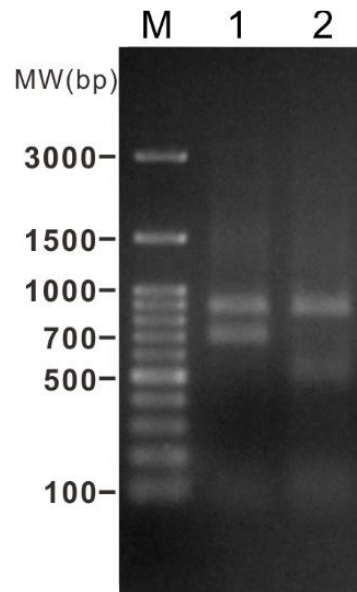

**Fig S1. Restriction fragment length polymorphism (RFLP) analysis of free-living cultured clade C and clade B *Symbiodinium*.** Amplified genomic fragments of small subunit ribosomal RNA genes (18S rDNA) from *Symbiodinium* were digested using the restriction enzymes *TaqI*. Lane 1: The free-living cultured clade C *Symbiodinium* (CCMP 2466). Lane 2: Free-living cultured clade B *Symbiodinium* (originally from *Exaiptasia pallida*). M: marker. MW: molecular weight.
